# Supplementary material for: Expression of Concern: Regulation of Brown Fat Adipogenesis by Protein Tyrosine Phosphatase 1B
Source: PubMed Central journal article supplement (PMC10735039; doi:10.1371/journal.pone.0296401), 2023-12-21

Different experimental groups of oil red O staining (Supporting the data in Figure 1)

# Fat cell differentiation and oil red O staining (group 1)

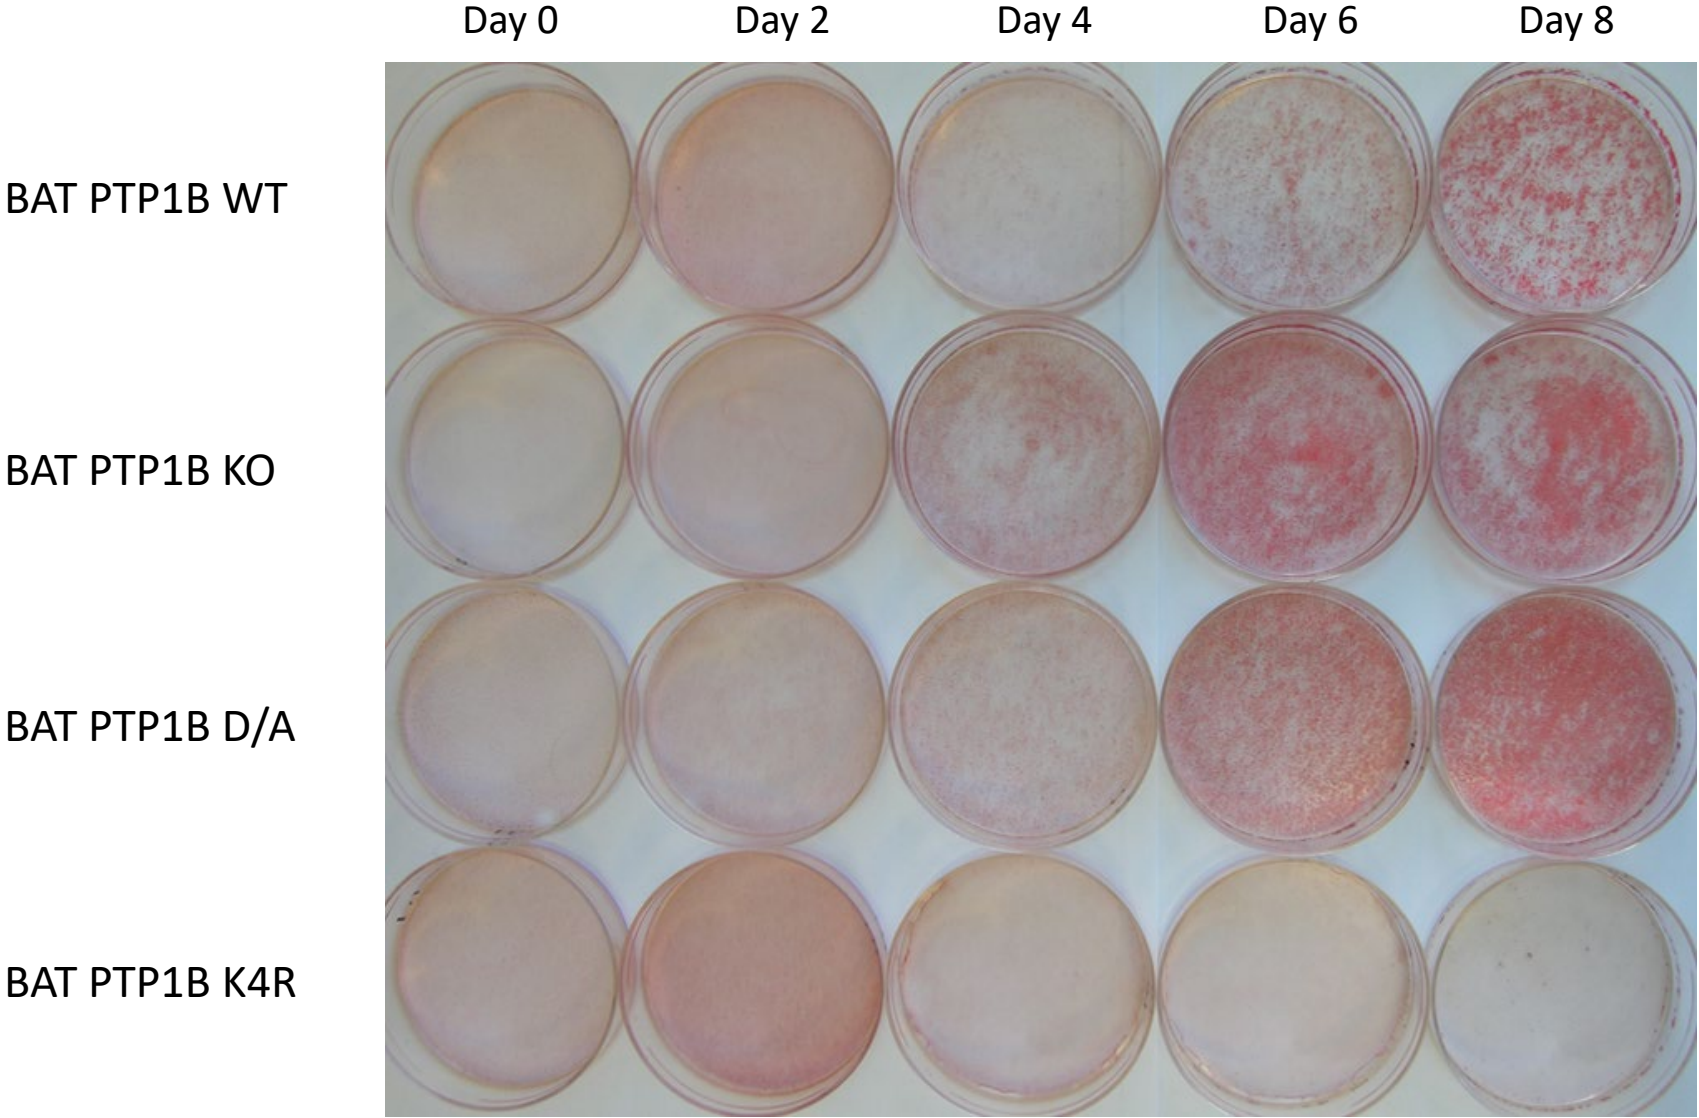

# Fat cell differentiation and oil red O staining (group 2)

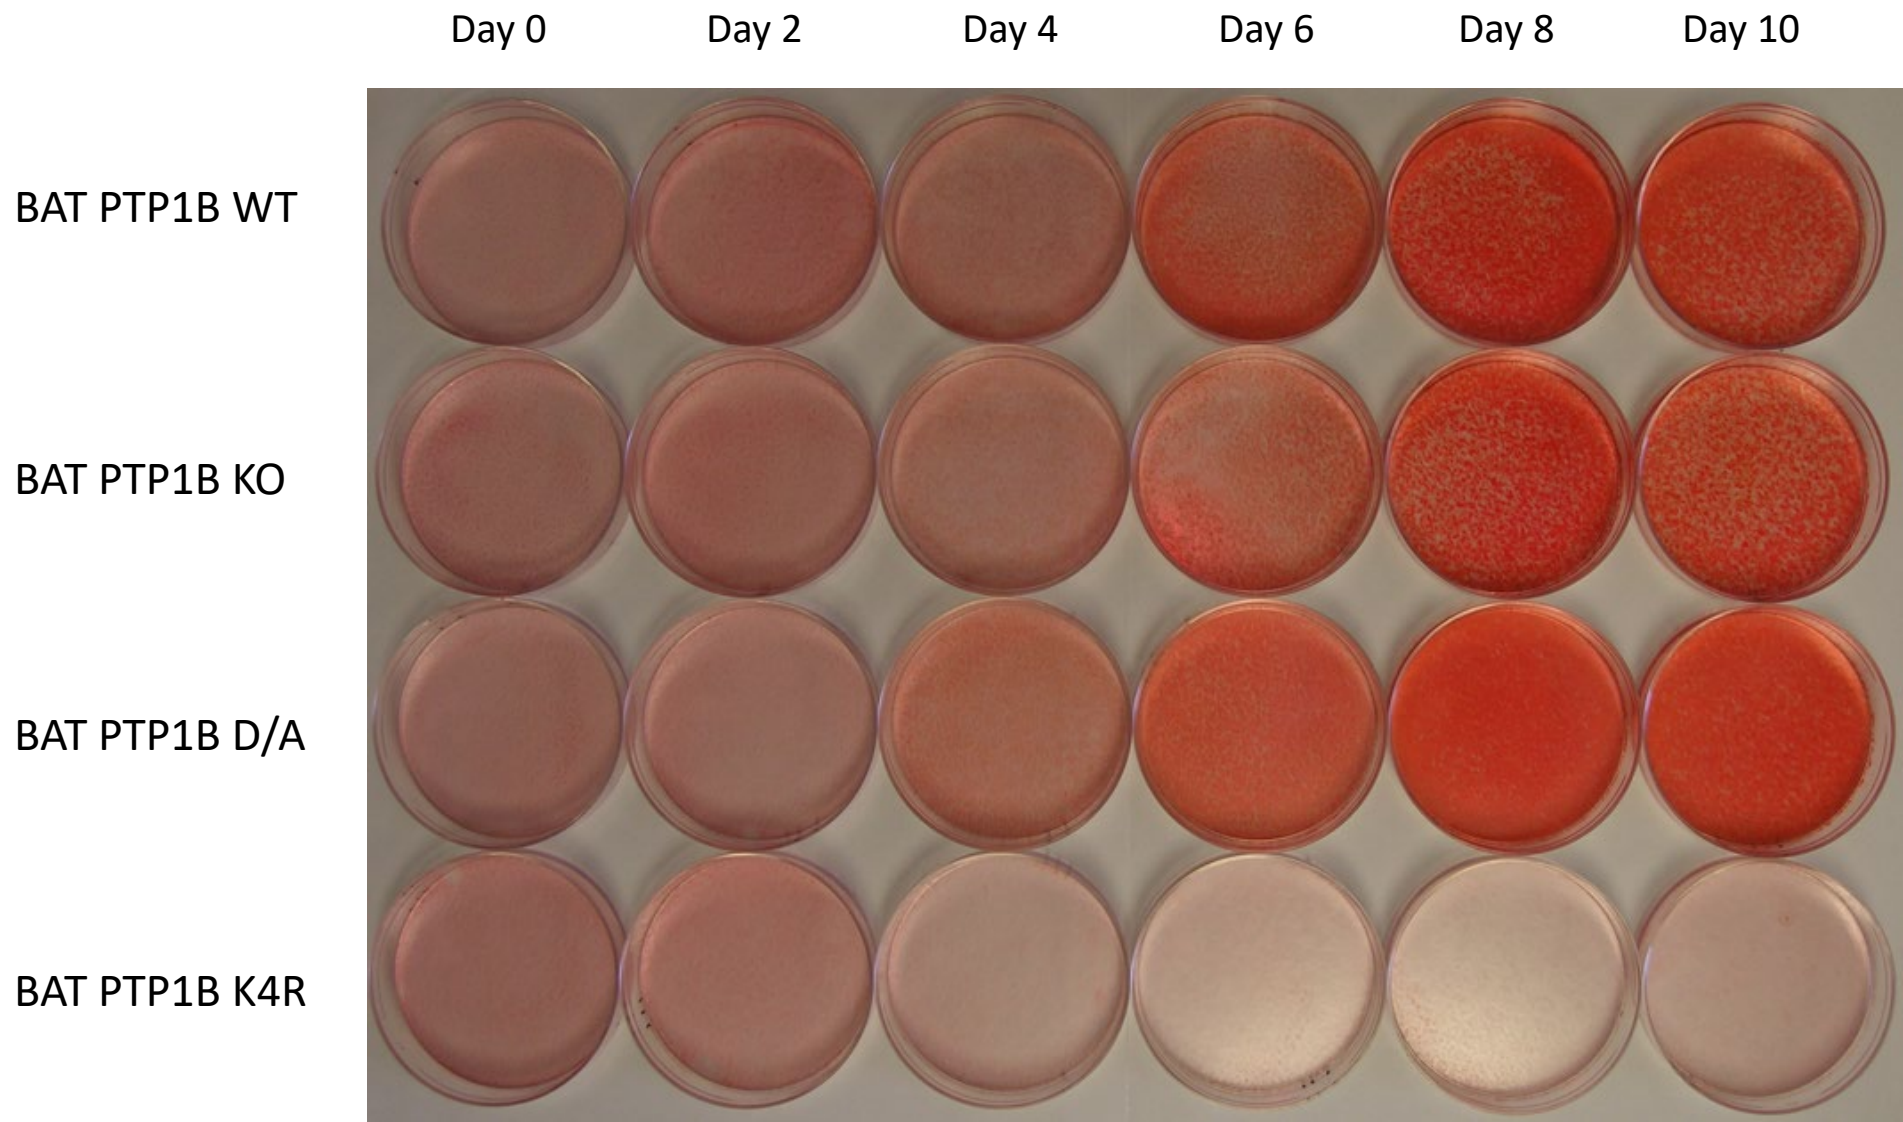

# Fat cell differentiation and oil red O staining (group 3)

Day 0

Day 2

Day 4

Day 6

Day 8

BAT PTP1B WT

BAT PTP1B KO

BAT PTP1B D/A

BAT PTP1B K4R

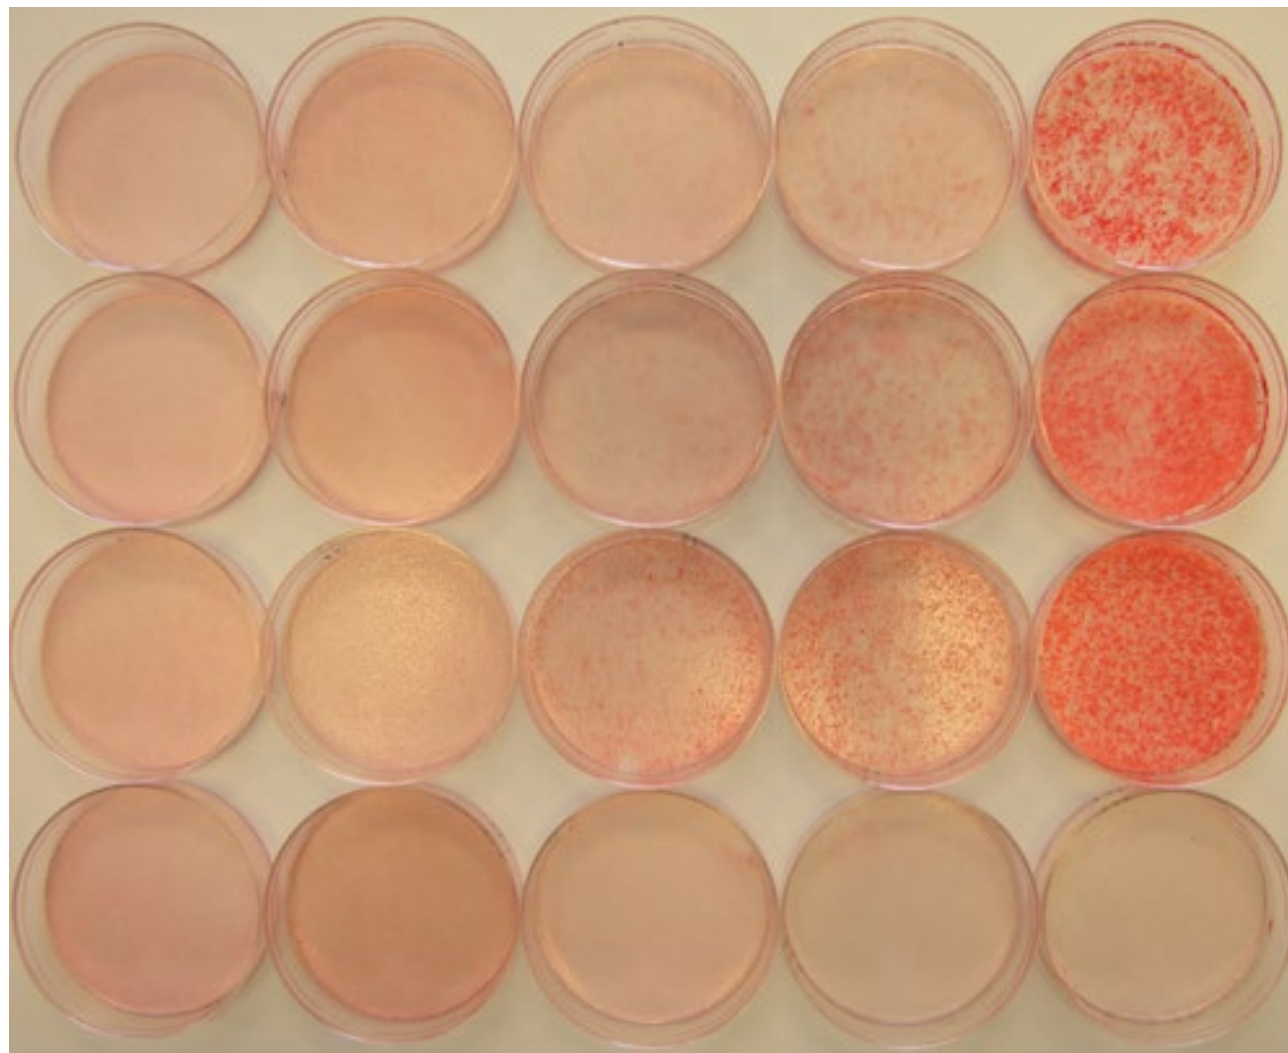

Supplement: pone.0296401.s002.pdf [file pone.0296401.s002.pdf]
